# Supplementary material for: Sildenafil dosed concomitantly with bosentan for adult pulmonary arterial hypertension in a randomized controlled trial
Source: Springer Nature journal article supplement (doi:10.1186/s12872-017-0674-3), 2017-09-05
Supplement: MOESM1 [file 15018326]

The List of Independent Ethics Committees, sorted by country and site, for sites that screened subjects

| Independent Ethics Committees Site Number                                    | Name and Address of Committee                                                                                                               |
|------------------------------------------------------------------------------|---------------------------------------------------------------------------------------------------------------------------------------------|
| <b>Australia</b>                                                             |                                                                                                                                             |
| 1016                                                                         | St. Vincent's Hospital Human Research Ethics Committee<br>Research Office Level 6 De Lacy Bldg<br>Victoria Street<br>Darlinghurst, NSW 2010 |
| 1017                                                                         | Prince Charles Hospital Human Research & Ethics Committee<br>The Prince Charles Hospital<br>Rode Road<br>Chermside, QLD 4032                |
| <b>Czech Republic</b>                                                        |                                                                                                                                             |
| 1032<br>1033                                                                 | Eticka komise IKEM a FTNsP<br>Videnska 800<br>Praha 4 Krc 140 59                                                                            |
| <b>France</b>                                                                |                                                                                                                                             |
| 1013<br>1034<br>1038                                                         | Comité de protection des<br>personnes<br><Nord Ouest IV><br>CHU Faculté de Médecine<br>Pôle Recherche<br>Lille 59045                        |
| <b>Germany</b>                                                               |                                                                                                                                             |
| 1005<br>1006<br>1007<br>1008<br>1036<br>1037<br>1042<br>1044<br>1051<br>1052 | Ethik-Kommission des Fachbereichs Medizin<br>Der Justus-Liebig- Universitaet Giessen<br>Gaffkystrasse 11 c<br>Giessen 35385                 |

|                       |                                                                                                                                              |
|-----------------------|----------------------------------------------------------------------------------------------------------------------------------------------|
| <b>Greece</b>         |                                                                                                                                              |
| 1040                  | National Ethics Committee<br>284 Mesogion Avenue<br>Athens 15562                                                                             |
| <b>Israel</b>         |                                                                                                                                              |
| 1024                  | Rabin MC Ethics Committee<br>Rabin MC<br>Belinson Campus<br>Petah Tikva 49100                                                                |
| 1026                  | Rambam Medical Center<br>Helsinki Committee<br>POB 9602, Bat Galim<br>Haifa 31096                                                            |
| <b>Italy</b>          |                                                                                                                                              |
| 1027                  | Comitato Etico Azienda Policlinico Umberto I<br>Viale del Policlinico, 155<br>Roma 00155                                                     |
| 1028                  | Comitato Etico, Azienda Ospedaliera Monaldi<br>Via Leonardo Bianchi<br>Napoli 80131                                                          |
| <b>Taiwan</b>         |                                                                                                                                              |
| 1039                  | National Taiwan University Hospital,<br>Research Ethics Committee<br>7 Chung Shan South Road<br>Taipei 100                                   |
| <b>United Kingdom</b> |                                                                                                                                              |
| 1035                  | Huntingdon Local Research Ethics Committee<br>REC Office<br>Victoria House<br>Capital Park<br>Fulbourne<br>Cambridge, Cambridgeshire CB1 5XB |

| <b>United States</b> |                                                                                                                                                                                      |
|----------------------|--------------------------------------------------------------------------------------------------------------------------------------------------------------------------------------|
| 1009                 | BCM Office of Research<br>Institutional Review Board for Human Subjects<br>Room 600D<br>One Baylor Plaza<br>Houston, TX 77030                                                        |
| 1018                 | Veterans Affairs Greater Los Angeles<br>Healthcare System IRB<br>Research and Development Office<br>11301 Wilshire Boulevard<br>Building 114, Mail Code-151<br>Los Angeles, CA 90073 |
| 1021                 | Allegheny General Hospital<br>Institutional Review Board<br>15th Floor, South Tower<br>320 East North Avenue<br>Pittsburgh, PA 15212-4772                                            |
| 1029                 | Henry Ford Hospital<br>Institutional Review Board (IRB)<br>2799 West Grand Boulevard<br>CFP - B<br>Detroit, MI 48202                                                                 |
| 1031                 | Western Institutional Review Board<br>3535 Seventh Avenue, South West<br>Olympia, WA 98502                                                                                           |
